# Supplementary material for: Thoracic involvement and imaging patterns in IgG4-related disease
Source: PubMed Central journal article supplement — Eur Respir Rev. 2021 Oct 6;30(162):210078. doi: 10.1183/16000617.0078-2021 (PMC9488667; doi:10.1183/16000617.0078-2021), 2021-10-06
Supplement: ERR-0078-2021_Supplementary_tables_and_figures.pdf [file ERR-0078-2021_Supplementary_tables_and_figures.pdf]

**Supplemental Table S1.** Analysis of thoracic CT scans of IgG4-RD patients with and without notified thoracic involvement

| Thoracic CT scans features                      | IgG4-RD<br>Group 1<br>(n=28) | IgG4-RD<br>Group 2<br>(n=20) | p value<br>(chi2) | All patients<br>(n=48) |
|-------------------------------------------------|------------------------------|------------------------------|-------------------|------------------------|
| Bronchiolitis (tree in bud)                     | 3 (11%)                      | 3 (15%)                      | 0.62              | 6 (13%)                |
| Bronchiolitis (alveolar nodules)                | 3 (11%)                      | 4 (20%)                      | 0.41              | 7 (15%)                |
| Bronchiectasis                                  | 9 (32%)                      | 5 (25%)                      | 0.66              | 14 (19%)               |
| GGO                                             | 6 (21%)                      | 0 (0%)                       | <b>0.03</b>       | 6 (13%)                |
| Area of consolidations                          | 9 (32%)                      | 3 (15%)                      | 0.23              | 12 (25%)               |
| Pleural effusion                                | 4 (14%)                      | 0 (0%)                       | 0.07              | 4 (8%)                 |
| Pleural thickening                              | 2 (7%)                       | 0 (0%)                       | 0.66              | 2 (6%)                 |
| Peribronchovascular thickening                  | 16 (57%)                     | 10 (50%)                     | 0.61              | 26 (54%)               |
| Solid nodules                                   | 12 (43%)                     | 4 (20%)                      | 0.09              | 16 (33%)               |
| Mucoid impactions                               | 6 (21%)                      | 2 (10%)                      | 0.32              | 8 (16%)                |
| Mediastinal lymph nodes                         | 15 (54%)                     | 11 (55%)                     | 0.84              | 26 (54%)               |
| Septal thickening                               | 5 (18%)                      | 2 (10%)                      | 0.42              | 7 (15%)                |
| Honeycombing                                    | 0 (0%)                       | 0 (0%)                       | NA                | 0 (0%)                 |
| Reticulations                                   | 7 (25%)                      | 0 (0%)                       | <b>0.01</b>       | 7 (15%)                |
| Architectural distortion                        | 4 (14%)                      | 0 (0%)                       | 0.08              | 4 (8%)                 |
| Retromediastinal fibrosis                       | 2 (7%)                       | 0 (0%)                       | 0.22              | 2 (4%)                 |
| <b>Patterns of IgG4-RD thoracic involvement</b> |                              |                              |                   |                        |
| Peribronchovascular involvement                 | 16 (57%)                     | 11 (55%)                     | 0.91              | 27 (56%)               |
| Lymph nodes enlargement                         | 8 (29%)                      | 7 (35%)                      | 0.62              | 15 (31%)               |
| Nodular                                         | 7 (25%)                      | 0 (0%)                       | <b>0.02</b>       | 7 (25%)                |
| Interstitial disease                            | 7 (25%)                      | 0 (0%)                       | <b>0.02</b>       | 7 (25%)                |
| GGO                                             | 5 (18%)                      | 0 (0%)                       | <b>0.05</b>       | 5 (10%)                |
| Pleural disease                                 | 4 (14%)                      | 0 (0%)                       | 0.07              | 4 (8%)                 |
| Retromediastinal fibrosis                       | 2 (7%)                       | 0 (0%)                       | 0.22              | 2 (4%)                 |

GGO: ground-glass opacities

**Supplemental Table S2.** Characteristics of biopsies performed in the patients with definite thoracic involvement

| Patients | Biopsied tissue      | Biopsy method                                  | Histological feature |                                |                        |                                               |                                                         |                  |
|----------|----------------------|------------------------------------------------|----------------------|--------------------------------|------------------------|-----------------------------------------------|---------------------------------------------------------|------------------|
|          |                      |                                                | Storiform fibrosis   | lymphoplasmacytic infiltration | Obliterative phlebitis | Absence of granuloma and clonal proliferation | IgG4 <sup>+</sup> plasma cells / high power field (HPF) | IgG4+/IgG+ ratio |
| 1        | Thoracic lymph node  | EBUS (endobronchial ultrasound)                | ×                    | ✓                              | ×                      | ✓                                             | 70                                                      | 70               |
|          | Pancreas             | Endoscopic retrograde cholangiopancreatography | ✓                    | ✓                              | ×                      | ✓                                             | 50                                                      | 40               |
| 2        | Pulmonary pleurae    | Percutaneous core cutting needle               | ✓                    | ✓                              | ×                      | ✓                                             | 60                                                      | 60               |
|          | Abdominal lymph node | Laparoscopy                                    | ×                    | ✓                              | ×                      | ✓                                             | 30                                                      | 70               |
|          | Salivary glands      | Surgical sampling                              | ×                    | ✓                              | ×                      | ✓                                             | 25                                                      | 60               |
| 3        | Thoracic lymph node  | EBUS                                           | ×                    | ✓                              | ×                      | ✓                                             | 60                                                      | 80               |
| 4        | Lung                 | Surgical sampling                              | ✓                    | ✓                              | ×                      | ✓                                             | 30                                                      | 50               |
|          | Thoracic lymph node  |                                                | ×                    | ✓                              | ×                      | ✓                                             | 40                                                      | 45               |
| 5        | Lung                 | Surgical sampling                              | ×                    | ✓                              | ×                      | ✓                                             | 100                                                     | 41               |
|          | Thoracic lymph node  |                                                | ×                    | ✓                              | ×                      | ✓                                             | 50                                                      | 70               |
| 6        | Thoracic lymph node  | Mediastinoscopy                                | ×                    | ✓                              | ×                      | ✓                                             | 60                                                      | 50               |
|          | Salivary gland       | Surgical sampling                              | ✓                    | ✓                              | ✓                      | ✓                                             | 40                                                      | 80               |
| 7        | Thoracic lymph node  | Mediastinoscopy                                | ×                    | ✓                              | ×                      | ✓                                             | 80                                                      | 45               |
| 8        | Thoracic lymph node  | EBUS                                           | ×                    | ✓                              | ×                      | ✓                                             | 50                                                      | 48               |
|          | Pancreas             | Endoscopic retrograde cholangiopancreatography | ✓                    | ✓                              | ×                      | ✓                                             | 30                                                      | 40               |
| 9        | Lung                 | EBUS                                           | ✓                    | ✓                              | ×                      | ✓                                             | 80                                                      | 60               |
| 10       | Lung                 | Surgical biopsy                                | ✓                    | ✓                              | ✓                      | ✓                                             | 60                                                      | 80               |
|          | Salivary gland       | Surgical sampling                              | ×                    | ✓                              | ×                      | ✓                                             | 30                                                      | 30               |
| 11       | Lung                 | EBUS                                           | ✓                    | ✓                              | ×                      | ✓                                             | 70                                                      | 90               |
| 12       | Pulmonary pleurae    | Percutaneous core cutting needle               | ✓                    | ✓                              | ×                      | ✓                                             | 56                                                      | 45               |
|          | Pancreas             | Endoscopic retrograde cholangiopancreatography | ×                    | ✓                              | ×                      | ✓                                             | 70                                                      | 80               |
| 13       | Thoracic lymph node  | Mediastinoscopy                                | ×                    | ✓                              | ×                      | ✓                                             | 70                                                      | 90               |
|          | Salivary gland       | Surgical sampling                              | ✓                    | ✓                              | ×                      | ✓                                             | 60                                                      | 50               |

| Patients | Biopsied tissue          | Biopsy method                                  | Histological feature |                                |                        |                                               |     | IgG4+ plasma cells / high power field (HPF) | IgG4+/IgG+ ratio |
|----------|--------------------------|------------------------------------------------|----------------------|--------------------------------|------------------------|-----------------------------------------------|-----|---------------------------------------------|------------------|
|          |                          |                                                | Storiform fibrosis   | lymphoplasmacytic infiltration | Obliterative phlebitis | Absence of granuloma and clonal proliferation |     |                                             |                  |
| 14       | Thoracic lymph node      | Mediastinoscopy                                | ×                    | ✓                              | ×                      | ✓                                             | 50  | 50                                          |                  |
|          | Prostate                 | Transrectal biopsy                             | ×                    | ✓                              | ✓                      | ✓                                             | 40  | 40                                          |                  |
| 15       | Thoracic lymph node      | Mediastinoscopy                                | ×                    | ✓                              | ×                      | ✓                                             | 150 | 80                                          |                  |
|          | Pancreas                 | Endoscopic retrograde cholangiopancreatography | ✓                    | ✓                              | ×                      | ✓                                             | 70  | 30                                          |                  |
| 16       | Thoracic lymph node      | EBUS                                           | ×                    | ✓                              | ×                      | ✓                                             | 50  | 50                                          |                  |
|          | Liver                    | Percutaneous needle biopsy                     | ✓                    | ✓                              | ×                      | ✓                                             | 60  | 90                                          |                  |
| 17       | Thoracic lymph node      | EBUS                                           | ×                    | ✓                              | ×                      | ✓                                             | 80  | 80                                          |                  |
|          | Salivary gland           | Surgical sampling                              | ✓                    | ✓                              | ×                      | ✓                                             | 40  | 45                                          |                  |
| 18       | Pulmonary pleurae        | Surgical sampling                              | ✓                    | ✓                              | ✓                      | ✓                                             | 60  | 45                                          |                  |
| 19       | Thoracic lymph node      | EBUS                                           | ×                    | ✓                              | ×                      | ✓                                             | 70  | 70                                          |                  |
|          | Salivary gland           | Surgical sampling                              | ✓                    | ✓                              | ✓                      | ✓                                             | 55  | 65                                          |                  |
| 20       | Thoracic lymph node      | EBUS                                           | ×                    | ✓                              | ×                      | ✓                                             | 60  | 80                                          |                  |
|          | Pancreas                 | Endoscopic retrograde cholangiopancreatography | ✓                    | ✓                              | ×                      | ✓                                             | 80  | 80                                          |                  |
|          | Salivary gland           | Surgical sampling                              | ×                    | ✓                              | ×                      | ✓                                             | 60  | 70                                          |                  |
| 21       | Thoracic lymph node      | Mediastinoscopy                                | ×                    | ✓                              | ×                      | ✓                                             | 40  | 45                                          |                  |
|          | Prostate                 | Transrectal biopsy                             | ✓                    | ✓                              | ×                      | ✓                                             | 30  | 40                                          |                  |
| 22       | Thoracic lymph node      | Mediastinoscopy                                | ×                    | ✓                              | ×                      | ✓                                             | 60  | 50                                          |                  |
|          | Retroperitoneal fibrosis | Surgical sampling                              | ✓                    | ✓                              | ×                      | ✓                                             | 70  | 60                                          |                  |
| 23       | Thoracic lymph node      | EBUS                                           | ×                    | ✓                              | ×                      | ✓                                             | 60  | 70                                          |                  |
|          | Liver                    | Percutaneous needle biopsy                     | ✓                    | ✓                              | ×                      | ✓                                             | 30  | 40                                          |                  |
|          | Kidney                   | Percutaneous needle biopsy                     | ×                    | ✓                              | ×                      | ✓                                             | 60  | 40                                          |                  |

**Supplemental Table S3.** Comparison of clinical and biological characteristics of IgG4-RD patients with and without IgG4-related thoracic involvement

|                                          | <b>IgG4-RD patients<br/>without thoracic<br/>involvement<br/>(n=146)<br/>n (%)</b> | <b>IgG4-RD patients<br/>with thoracic<br/>involvement<br/>(N=48)<br/>n (%)</b> | <b>p-value</b>     |
|------------------------------------------|------------------------------------------------------------------------------------|--------------------------------------------------------------------------------|--------------------|
| <b>Demographic data</b>                  |                                                                                    |                                                                                |                    |
| Male                                     | 106 (72.6)                                                                         | 39 (81)                                                                        | p = 0.23           |
| Median age at onset (years) [range]      | 58 [12 ;89]                                                                        | 60 [23;83]                                                                     | p = 0.86           |
| Median diagnostic delay (months) [range] | 18 [1 ;292]                                                                        | 6 [1; 240]                                                                     | <b>p &lt; 0.01</b> |
| <b>Organ involvement</b>                 |                                                                                    |                                                                                |                    |
| Mean number of organs affected [range]   | 2.5 [1-6]                                                                          | 3 [1-6]                                                                        | <b>p = 0.049</b>   |
| Lymph nodes                              | 74 (50.7)                                                                          | 30 (62.5)                                                                      | p = 0.14           |
| Autoimmune pancreatitis                  | 51 (34.9)                                                                          | 15 (31.2)                                                                      | p = 0.64           |
| Tubulointerstitial nephritis             | 38 (26)                                                                            | 15 (31.2)                                                                      | p = 0.48           |
| Sialadenitis                             | 45 (30.9)                                                                          | 15 (31.2)                                                                      | p = 0.84           |
| Retroperitoneal fibrosis                 | 33 (22.6)                                                                          | 10 (20.8)                                                                      | p = 0.80           |
| Sclerosing cholangitis                   | 38 (26)                                                                            | 10 (20.8)                                                                      | p = 0.47           |
| Aortitis                                 | 19 (13)                                                                            | 8 (16.6)                                                                       | p = 0.53           |
| Dacryoadenitis                           | 14 (9.6)                                                                           | 6 (12.5)                                                                       | p = 0.57           |
| Prostatitis                              | 10 (6.8)                                                                           | 3 (6.2)                                                                        | p = 0.86           |
| Testicular involvement                   | 6 (4.1)                                                                            | 0 (0)                                                                          | p = 0.15           |
| Hypophysitis                             | 2 (1.3)                                                                            | 0 (0)                                                                          | p = 0.41           |
| Thyroiditis                              | 5 (3.4)                                                                            | 0 (0)                                                                          | p = 0.19           |
| <b>Biological characteristics</b>        |                                                                                    |                                                                                |                    |
| Elevated serum IgG (> 1400 mg/dL)        | 89/128 (69.5)                                                                      | 43 (89.5)                                                                      | <b>p &lt; 0.01</b> |
| Serum IgG4 level >135 mg/dL              | 112/136 (82.4)                                                                     | 43 (89.5)                                                                      | p = 0.24           |
| Serum IgG4 level >2xN                    | 84/136 (61.8)                                                                      | 32 (66.7)                                                                      | p = 0.55           |
| Median serum IgG4 level (mg/dL) [range]  | 590 [4; 8970]                                                                      | 430 [23; 2040]                                                                 | p = 0.61           |
| Low C3 (<80 mg/dL)                       | 22/81 (27.2)                                                                       | 13 (27)                                                                        | p = 0.90           |
| Low C4 (<15 mg/dL)                       | 21/77 (27.3)                                                                       | 13 (27)                                                                        | p = 0.91           |
| Low CH50 (<70%)                          | 19/72 (26.4)                                                                       | 13 (27)                                                                        | p = 0.89           |
| Elevated CRP level (>5 mg/L)             | 92/125 (73.6)                                                                      | 39 (81.2)                                                                      | <b>p = 0.02</b>    |
| Positive ANA (>1/160)                    | 22/107 (20.5)                                                                      | 9 (18.8)                                                                       | p = 0.80           |

**Supplemental figure S1.** Flow chart showing the search strategy

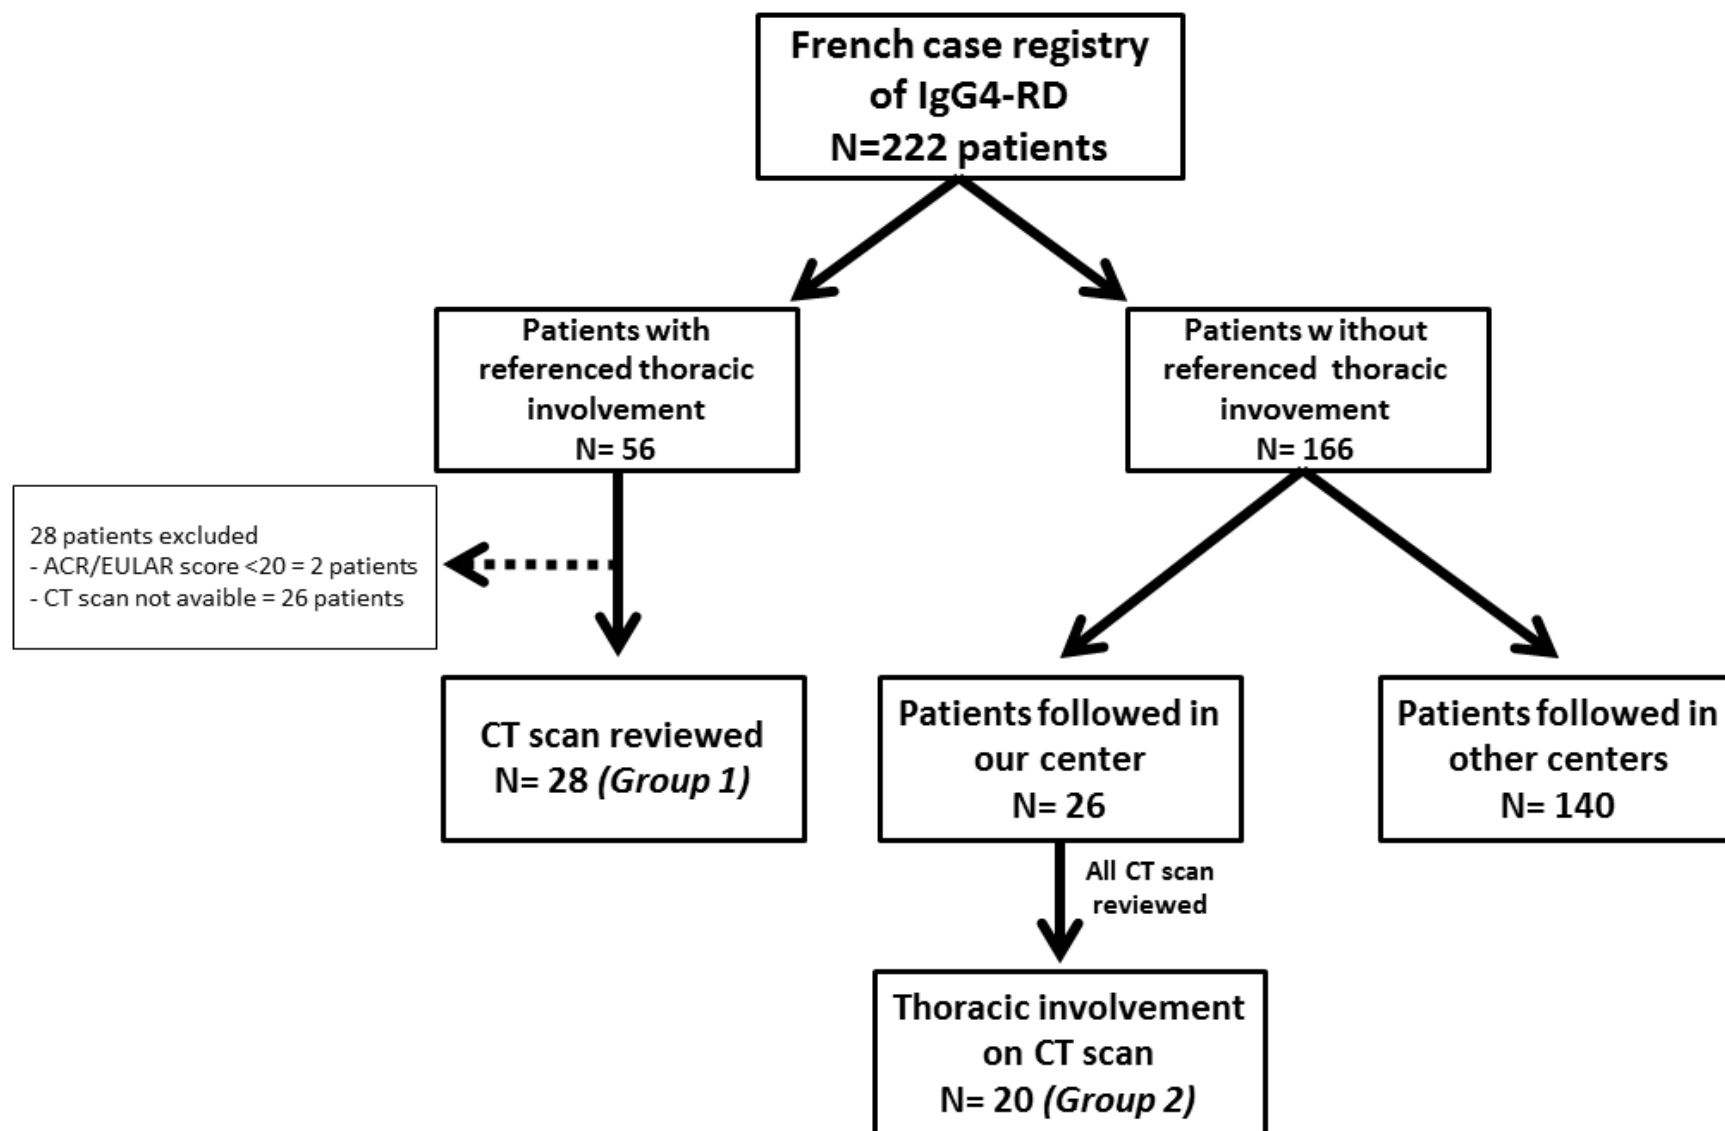

**Supplemental figure S2.** Evolution of lung CT scan in a patient with IgG4-RD before and after treatment with prednisone and rituximab

Axial and coronal enhanced thoracic CT scan from a patient with IgG4-related lung involvement with ground glass opacities pattern. A. B. axial slices showing round shape ground glass opacities with centrilobular distribution (arrows) C. coronal reconstruction (arrows). D. E. F. After treatment with prednisone and rituximab, complete regression of ground glass opacities.
